# Supplementary material for: Integrated Bioinformatic Investigation of EXOSCs in Hepatocellular Carcinoma Followed by the Preliminary Validation of EXOSC5 in Cell Proliferation
Source: MDPI journal article supplement (doi:10.3390/ijms232012161), 2022-10-12
Supplement: s1 [file s1]

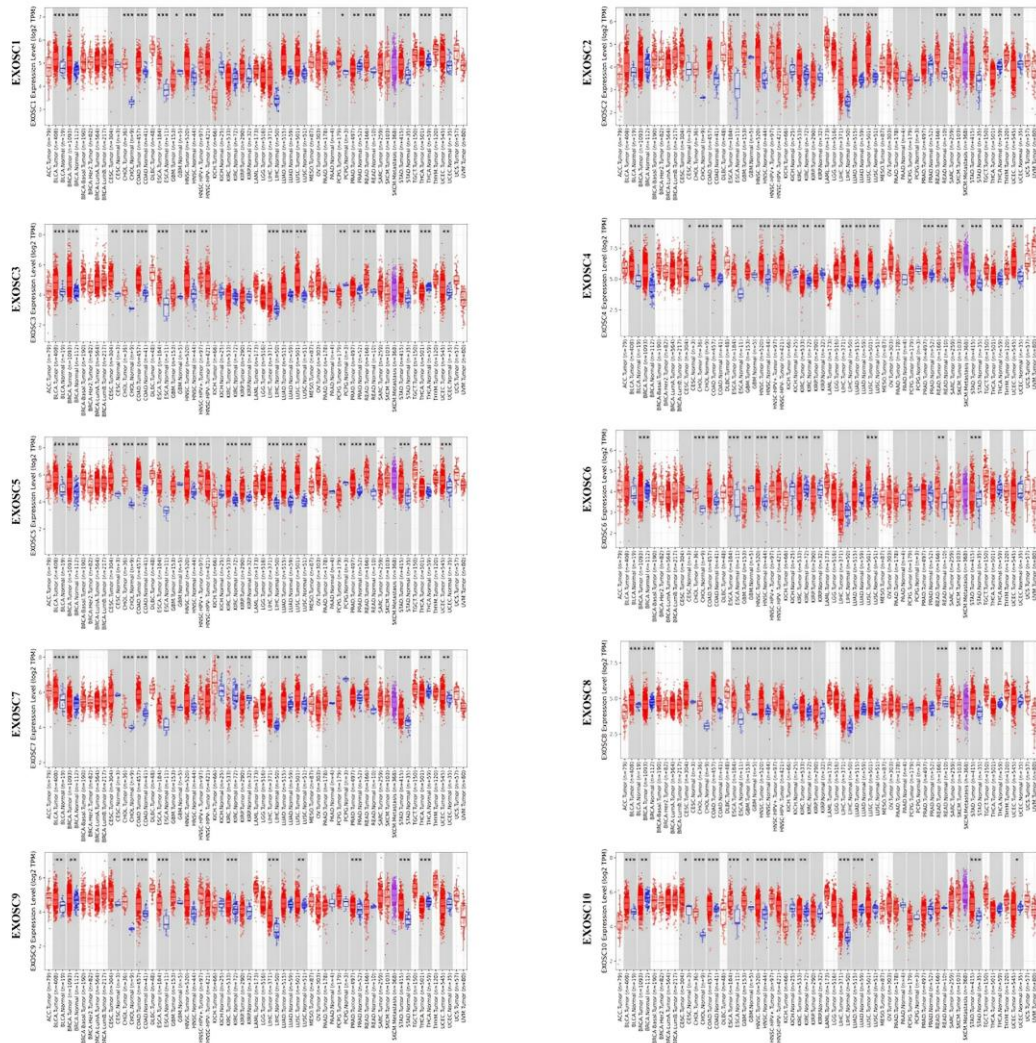

**Figure S1.** The expression level of the EXOSCs in different tumor tissues and para-cancerous tissues in the TCGA database were determined by TIMER.

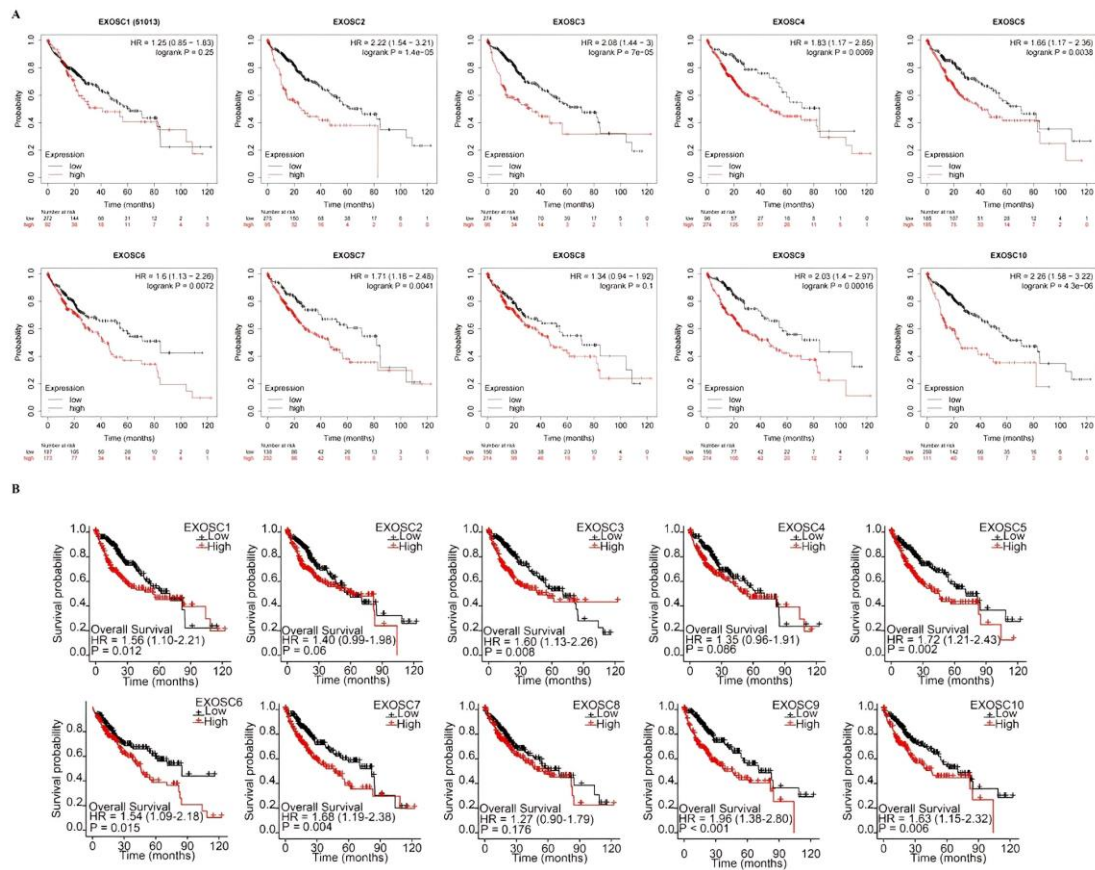

**Figure S2. Prognostic characteristics of EXOSCs in patients with HCC.**

(A) Up-regulated EXOSCs was associated with shorter OS, except EXOSC1/8 (TCGA database).  
 (B) Higher mRNA expressions of EXOSCs were significantly associated with poor OS, except EXOSC2/4/8 (Kaplan-Meier plotter).

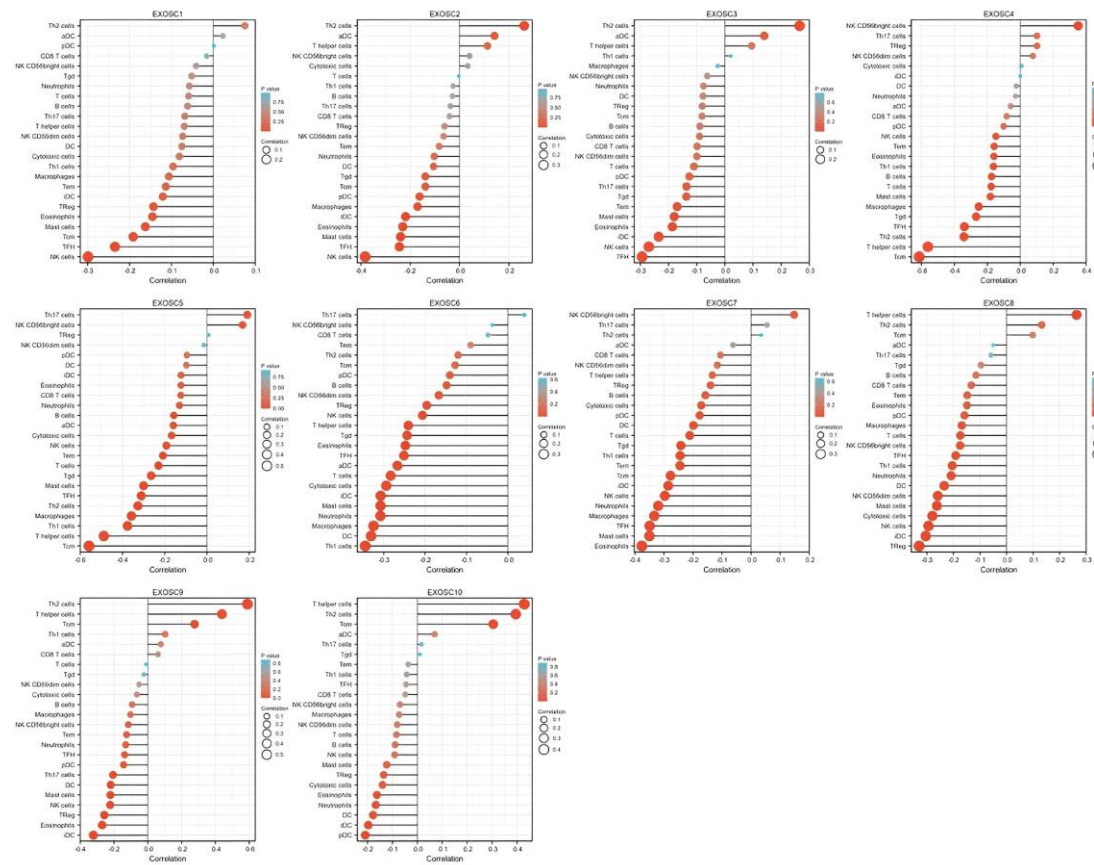

**Figure S3.** Analysis the correlation between EXOSCs expression and diverse immune cell infiltration.
